# Supplementary material for: Tissue Specific Heterophile Aggregation of Protogenes Promoted Heterosis
Source: Research Square preprint supplement (doi:10.21203/rs.3.rs-380439/v1), 2021-04-19
Supplement: Supplementary file 1 [file 46bdbb3eded88e6877342762.xlsx]

## Sheet: Sheet1
Table S1 Different gene expression between inbred lines
	Type	Leaf	Ear	Seed
Z vs C	Z>C	14316	13582	22799
	Z<C	14856	16462	7694
	Z=C=0	6541	5669	5220
Z vs M	Z>M	16801	15086	16997
	Z<M	12143	14971	14001
	Z=M=0	6769	5656	4715
Z vs Q	Z>Q	18233	15232	17065
	Z<Q	10647	14836	14122
	Z=Q=0	6833	5645	4526
C vs M	C>M	17022	16386	8342
	C<M	11926	13871	22018
	C=M=0	6765	5456	5353
C vs Q	C>Q	18044	16735	8564
	C<Q	10691	13422	21814
	C=Q=0	6978	5556	5335
M vs Q	M>Q	16630	15313	15674
	M<Q	11999	14853	15384
	M=Q=0	7084	5547	4655
