# Supplementary material for: Tissue Specific Heterophile Aggregation of Protogenes Promoted Heterosis
Source: Research Square preprint supplement (doi:10.21203/rs.3.rs-380439/v1), 2021-04-19
Supplement: Supplementary file 2 [file d1045e445ff98e0df36bece3.xlsx]

## Sheet: Sheet1
Table S4 Classification of differentially expressed genes in different tissues
	Negative Super-dominance	Negative Dominant	Partial Negative Dominance	Mid-parent (Additive, MP)	Partial Positive Dominance	Positive Dominance	Positive Super-dominance
	(NSD)	(ND)	(PND)		(PPD)	(PD)	(PSD)
ZC_L	4412	1312	2269	3497	3426	2425	6646
ZM_L	4499	926	1412	2270	2831	2615	9570
CM_L	6592	2119	3188	4271	2969	1655	3257
ZQ_L	10087	1830	2093	2256	2110	1625	3798
CQ_L	8838	2215	2526	2597	2099	1702	3844
MQ_L	6831	1867	2568	3266	2740	1908	4454
ZC_E	5661	1668	2880	3936	3346	2285	5284
ZM_E	8116	2050	2618	2904	2209	1959	5331
CM_E	6822	1952	2681	3102	2494	2276	5742
ZQ_E	7837	1944	2840	3456	2816	2075	4262
CQ_E	7716	1843	2546	3142	2781	2499	4598
MQ_E	8921	1746	2323	2795	2063	1687	5738
ZC_S	2962	952	1737	3292	4698	4069	7222
ZM_S	2228	543	831	1346	2162	2784	15640
CM_S	3538	794	1157	1551	2312	3793	11369
ZQ_S	2397	779	1396	2438	3637	3870	11165
CQ_S	2617	574	853	1187	1914	3148	13972
MQ_S	3849	719	1023	1452	2048	2318	14021
